# Supplementary material for: Phylogenetic Analysis of Hepatitis C Virus Infections in a Large Belgian Cohort Using Next-Generation Sequencing of Full-Length Genomes
Source: Viruses. 2023 Dec 8;15(12):2391. doi: 10.3390/v15122391 (PMC10747466; doi:10.3390/v15122391)
Supplement: Supplementary file 1 [file viruses-15-02391-s001.zip]

Archive with 7 entries (7 files):
- FigureS1.svg
- FigureS1.tif
- FigureS2.svg
- FigureS2.tif
- FigureS3.svg
- FigureS3.tif
- Supplementary_Materials.pdf
